# Supplementary material for: Deciphering the Functioning of Microbial Communities: Shedding Light on the Critical Steps in Metaproteomics
Source: PubMed Central journal article supplement (PMC6821674; doi:10.3389/fmicb.2019.02395), 2019-10-24
Supplement: Image_2.pdf [file Image_2.pdf]

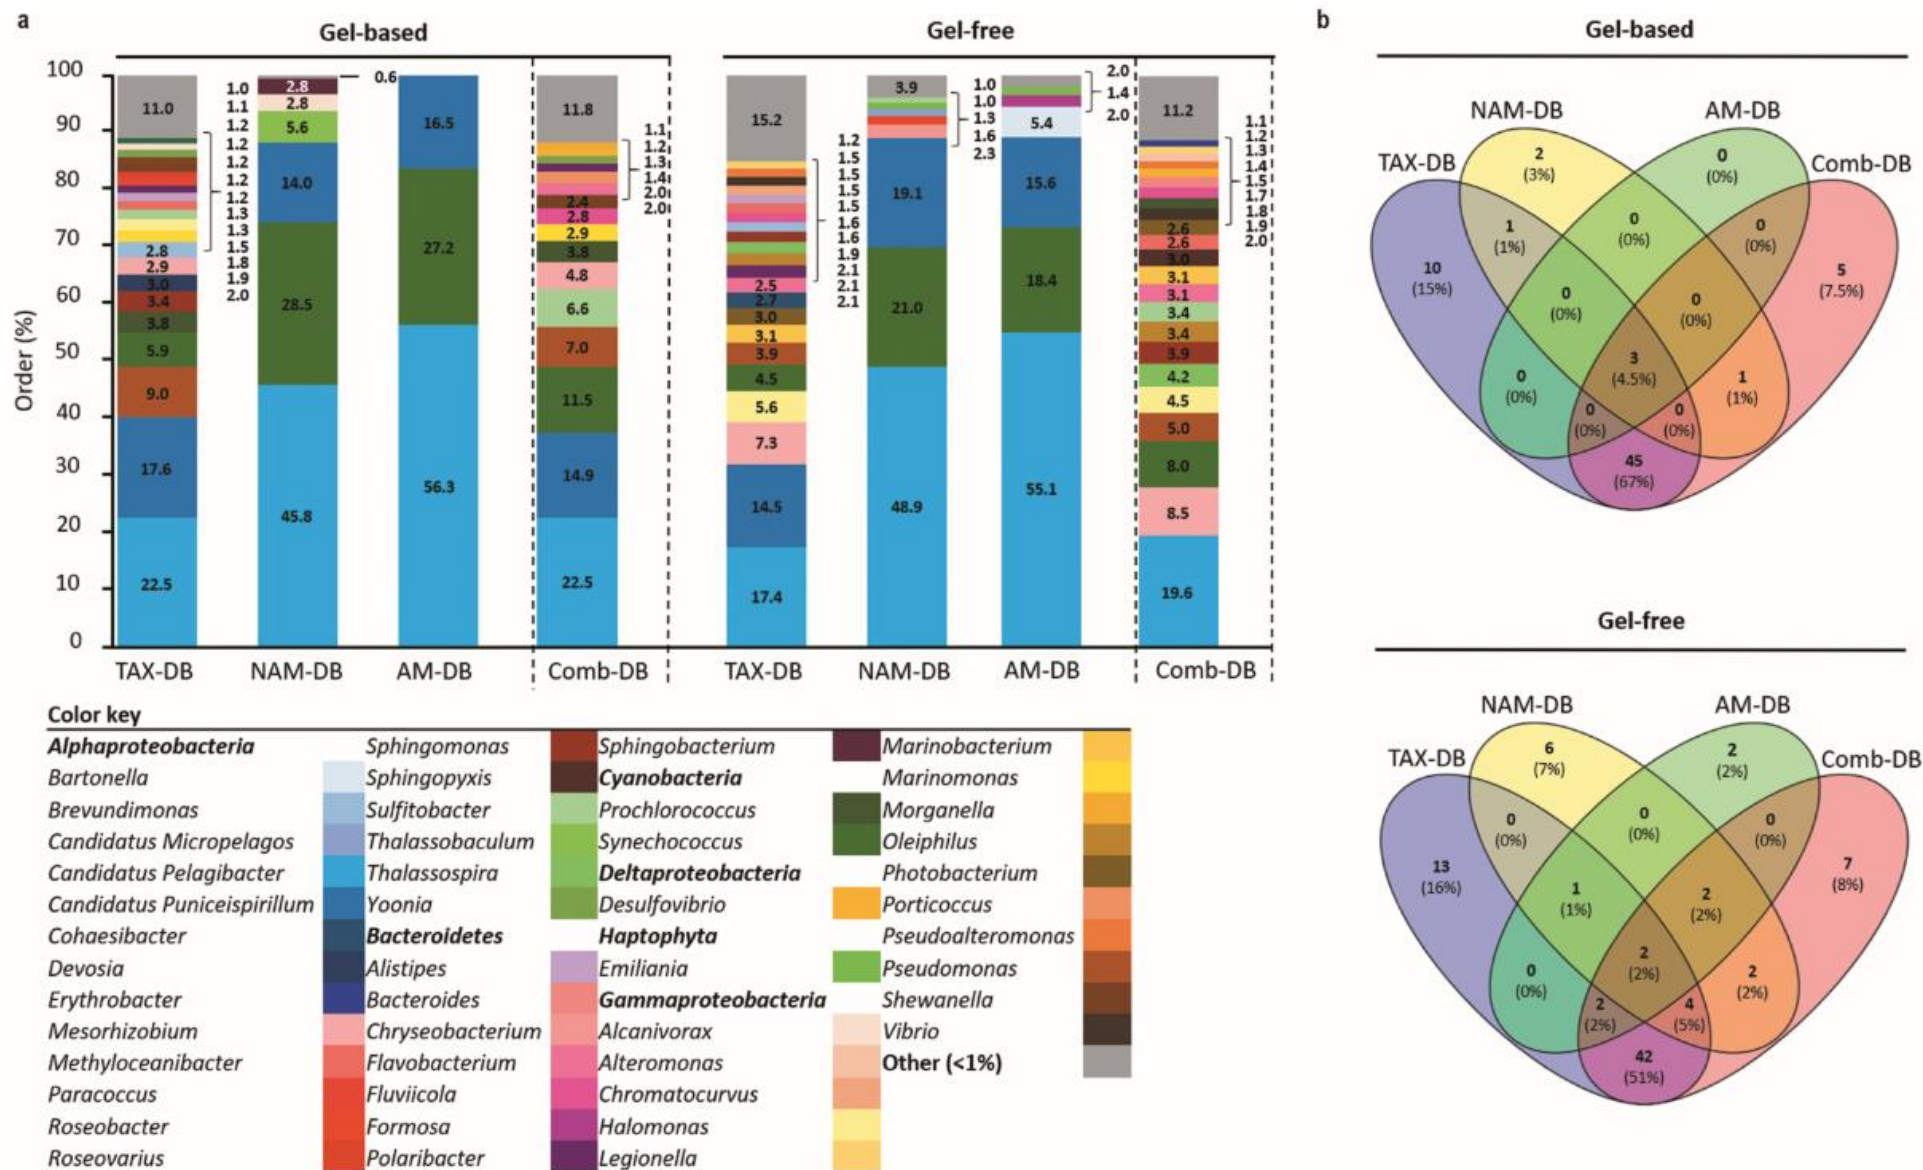

(a) Relative taxonomic composition at family level for each methodology. Values represent the proportion of proteins with identical taxonomy on total identified protein using TAX-DB, NAM-DB, AM-DB or Comb-DB in both gel-free and gel-based approaches. The number of peptides detected for each protein was used as quantitative value. Taxa displaying a proportion < 1% were gathered into "Other" category. (b) Venn diagrams showing the number of common and unique taxa identified at family level.
