# Supplementary material for: Deciphering the Functioning of Microbial Communities: Shedding Light on the Critical Steps in Metaproteomics
Source: PubMed Central journal article supplement (PMC6821674; doi:10.3389/fmicb.2019.02395), 2019-10-24
Supplement: Presentation_2.pdf [file Presentation_2.pdf]

Examples of functional consensus annotations returned using mPies based on the 20 best blast hits. The three examples were retrieved using second-round search NAM-DB in gel-free approach.

**Example A:** automatic mPies annotation

| <b>Candidate annotations from the top alignment hits</b> | <b>Frequency</b> | <b>Similarity (%)</b> |
|----------------------------------------------------------|------------------|-----------------------|
| Glutamine synthetase                                     | 16               | 80                    |
| Glutamine synthetase nodule isozyme                      | 1                | 5                     |
| Glutamine synthetase root isozyme 3                      | 1                | 5                     |
| Glutamine synthetase root isozyme A                      | 1                | 5                     |
| Glutamine synthetase root isozyme B                      | 1                | 5                     |

**Consensus functional annotation**

Glutamine synthetase

**Example B:** manual annotation

| <b>Candidate annotations from the top alignment hits</b> | <b>Occurrences</b> | <b>Proportion (%)</b> |
|----------------------------------------------------------|--------------------|-----------------------|
| 60 kDa chaperonin 1                                      | 9                  | 45                    |
| 60 kDa chaperonin 2                                      | 3                  | 15                    |
| 60 kDa chaperonin 3                                      | 3                  | 15                    |
| 60 kDa chaperonin                                        | 2                  | 10                    |
| 60 kDa chaperonin 4                                      | 1                  | 5                     |
| 60 kDa chaperonin 5                                      | 1                  | 5                     |
| 60 kDa chaperonin 7                                      | 1                  | 5                     |

**Consensus functional annotation**

60 kDa chaperonin

**Example C:** no consensus annotation

| <b>Candidate annotations from the top alignment hits</b> | <b>Occurrences</b> | <b>Proportion (%)</b> |
|----------------------------------------------------------|--------------------|-----------------------|
| 3-hexulose-6-phosphate synthase                          | 2                  | 25                    |
| 5,6,7,8-tetrahydromethanopterin hydro-lyase              | 2                  | 25                    |
| 5,6,7,8-tetrahydromethanopterin hydro-lyase              | 2                  | 25                    |
| Bifunctional enzyme Fae/Hps                              | 2                  | 25                    |

**Consensus functional annotation**

NA
